# Supplementary material for: Glyoxalase 1 gene is highly expressed in basal-like human breast cancers and contributes to survival of ALDH1-positive breast cancer stem cells
Source: PubMed Central journal article supplement (PMC6284866; doi:10.18632/oncotarget.26369), 2018-11-23
Supplement: oncotarget-09-36515-s001.pdf [file oncotarget-09-36515-s001.pdf]

# Glyoxalase 1 gene is highly expressed in basal-like human breast cancers and contributes to survival of ALDH1-positive breast cancer stem cells

## SUPPLEMENTARY MATERIALS

### Chemicals and reagents

Rabbit anti-Notch1 polyclonal antibody (sc-6014) and APC-conjugated anti-CD133 antibody (130090854) were purchased from Santa Cruz Biotechnology (U.S.A.) and Miltenyi Biotec (U.S.A.), respectively.

### Flow cytometric analysis

After transfection of siRNAs for 48 h, cells ( $2.0 \times 10^6$  cells/mL) were dissociated in FACS buffer ( $1 \times$  PBS supplemented with 2% FBS), incubated with APC-conjugated anti-CD133 antibody for 10 min on ice, and analyzed using a FACS Calibur flow cytometer (BD Biosciences). Unstained cells were used as a gating control. The data was analyzed using FlowJo 8.8.4 software. Three independent assays were performed for confirmation.

### Survival analysis

From the TCGA dataset in OncoPrint, we obtained overall survival follow-up times (days) and survival statuses for 447 of 532 patients. We defined two groups based on *Glo1* expression: *Glo1*<sup>high</sup> (log<sub>2</sub> median centered

intensity > 0) and *Glo1*<sup>low</sup> (log<sub>2</sub> median centered intensity < 0) (Supplementary Figure 1A). From the METABRIC dataset in cBioportal, we obtained the overall survival (months) and overall survival status for 1904 patients. We defined another two groups based on *Glo1* expression: *Glo1*<sup>high</sup> (z-score > 0) and *Glo1*<sup>low</sup> (z-score < 0) (Supplementary Figure 1B). Differences between overall survival in Kaplan-Meier analyses were determined using the log-rank test. Multivariable Cox regression was used to evaluate the influence of *Glo1* expression with age and tumor stage as confounding factors. All statistical analyses were performed using R version 3.4.1 (R Foundation for Statistical Computing, Vienna, Austria).

### Analysis of TCGA dataset of several cancers

The Cancer Genome Atlas (TCGA) dataset was downloaded from OncoPrint (<https://www.oncoPrint.org>, Compendia Bioscience, Ann Arbor, MI, USA). Levels of GLO1 mRNA expression in colon, lung, renal, uterine (reporter: A\_32\_P53822), brain, and ovarian cancer and leukemia (reporter: 200681) tissues and the corresponding normal tissues were displayed using log<sub>2</sub> median-centered ratio boxplots for normal vs. cancer tissue. The *p* values are calculated using the Mann-Whitney *U* test.

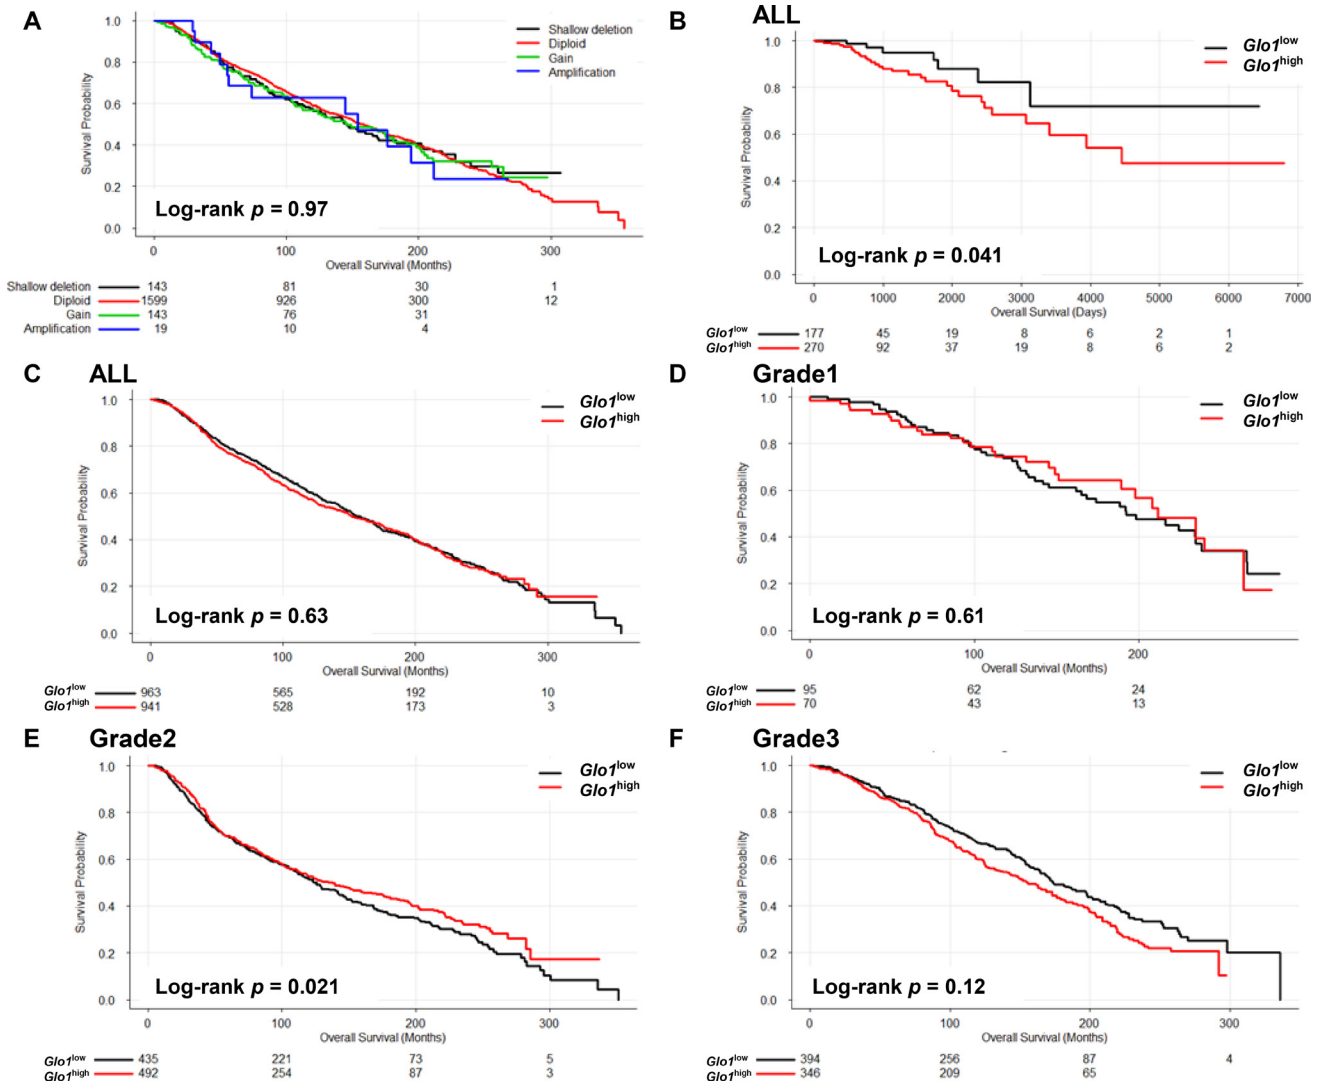

**Supplementary Figure 1: Effect of *Glo1* expression on overall survival in breast cancer.** (A) Kaplan-Meier analysis of overall survival of breast cancer patients, taking into consideration *Glo1* copy number alteration status, including shallow deletion ( $n = 143$ ), diploid ( $n = 1599$ ), gain ( $n = 143$ ), and amplification ( $n = 19$ ) (from the METABRIC dataset). (B) Kaplan-Meier analysis of overall survival of breast cancer patients with *Glo1*<sup>high</sup> ( $n = 270$ ) and *Glo1*<sup>low</sup> ( $n = 177$ ) (from the TCGA dataset). (C) Kaplan-Meier analysis of overall survival of breast cancer patients with *Glo1*<sup>high</sup> ( $n = 941$ ) and *Glo1*<sup>low</sup> ( $n = 963$ ) (from METABRIC dataset). (D-F) Kaplan-Meier analysis of overall survival of breast cancer patients, taking into consideration *Glo1* expression level and tumor grade (D); *Glo1*<sup>high</sup> ( $n = 69$ ) vs. *Glo1*<sup>low</sup> ( $n = 96$ ) in Grade 1, (E); *Glo1*<sup>high</sup> ( $n = 346$ ) vs. *Glo1*<sup>low</sup> ( $n = 394$ ) in Grade 2, (F); *Glo1*<sup>high</sup> ( $n = 492$ ) vs. *Glo1*<sup>low</sup> ( $n = 435$ ) in Grade 3) (from METABRIC dataset).

### Normal-like

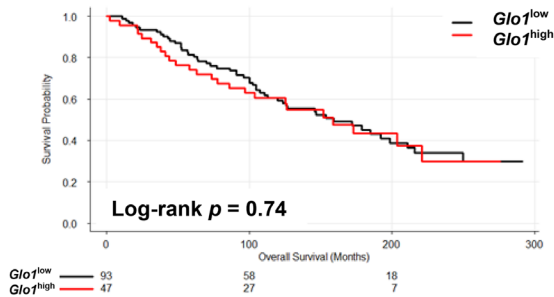

### Luminal A

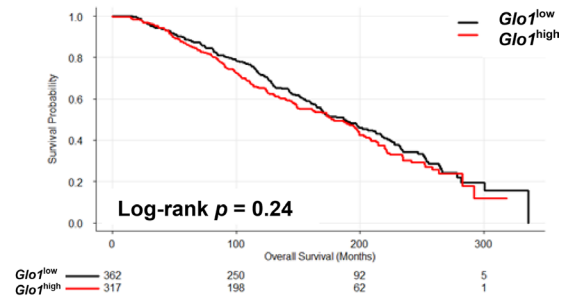

### Luminal B

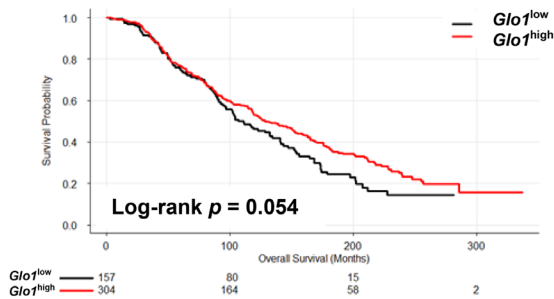

### HER2-enriched

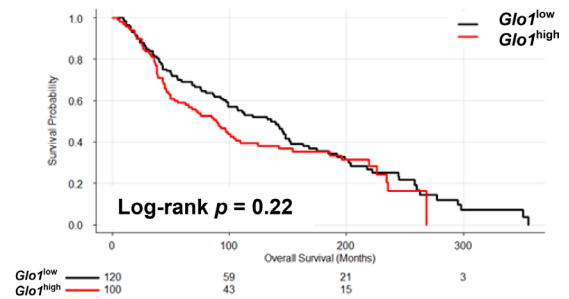

### Claudin-low

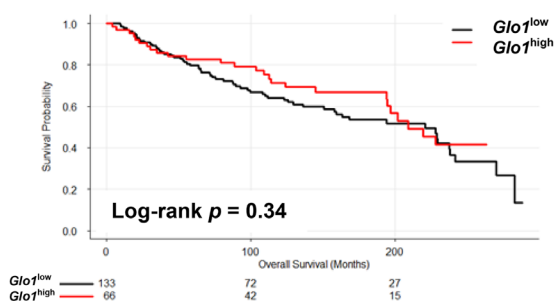

### Basal-like

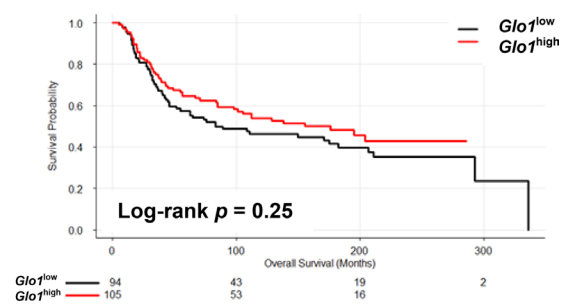

**Supplementary Figure 2: Effect of *Glo1* expression on overall survival in breast cancer subtypes.** Kaplan–Meier analysis showing the effect of *Glo1* expression on overall survival of patients with the indicated breast cancer subtype (Upper: left, *Glo1*<sup>high</sup> ( $n = 47$ ) vs. *Glo1*<sup>low</sup> ( $n = 93$ ) in Normal-like; right, *Glo1*<sup>high</sup> ( $n = 317$ ) vs. *Glo1*<sup>low</sup> ( $n = 362$ ) in Luminal A; Middle: left, *Glo1*<sup>high</sup> ( $n = 304$ ) vs. *Glo1*<sup>low</sup> ( $n = 157$ ) in Luminal B. right, *Glo1*<sup>high</sup> ( $n = 100$ ) vs. *Glo1*<sup>low</sup> ( $n = 120$ ) in HER2-enriched; lower: left, *Glo1*<sup>high</sup> ( $n = 66$ ) vs. *Glo1*<sup>low</sup> ( $n = 133$ ) in Claudin-low; right, *Glo1*<sup>high</sup> ( $n = 105$ ) vs. *Glo1*<sup>low</sup> ( $n = 94$ ) in Basal-like) (from the METABRIC dataset).

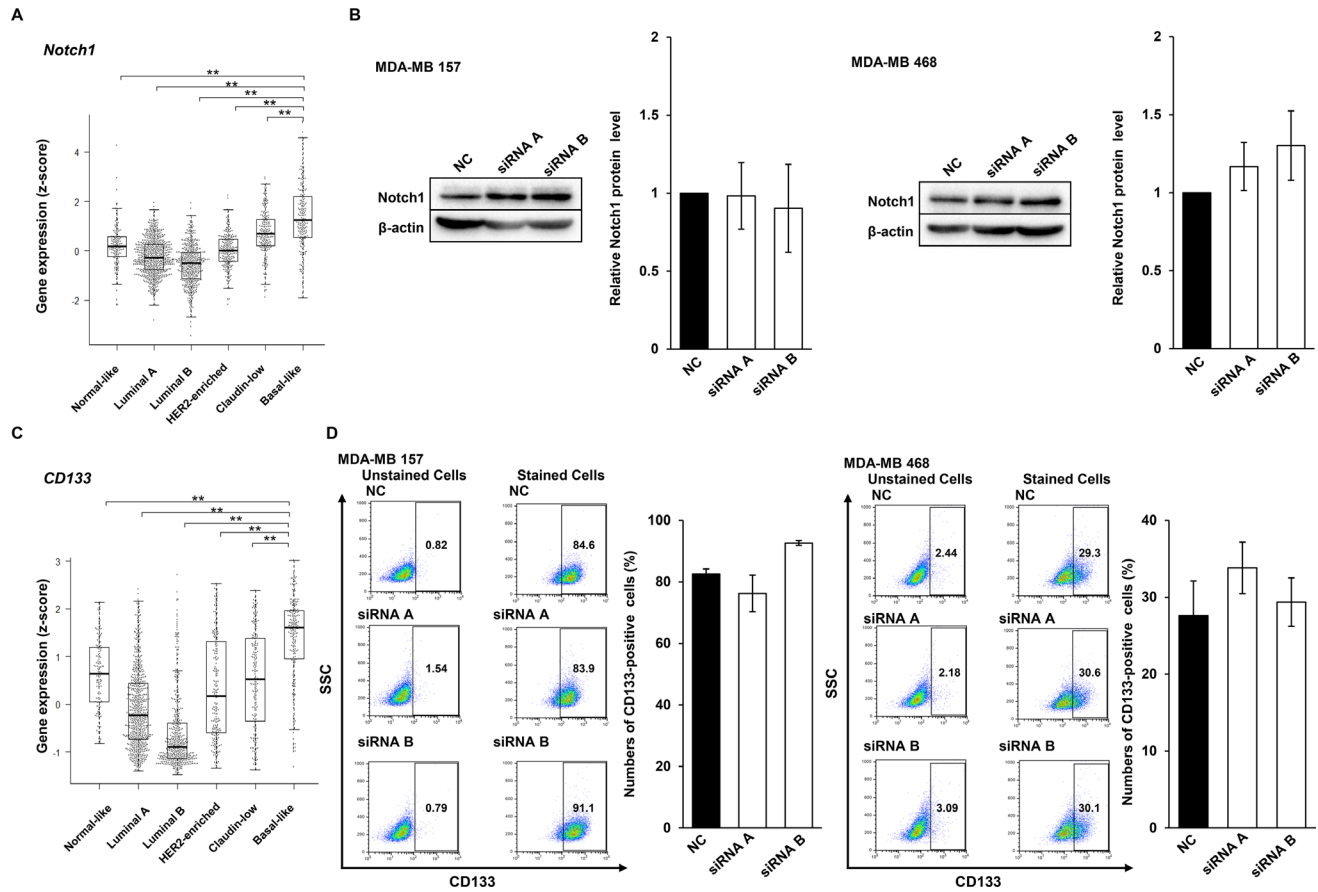

**Supplementary Figure 3: Notch1 and CD133 levels after GLO1 knockdown.** (A) *NOTCH1* gene expression in breast cancer subtypes (from METABRIC dataset): center line, median; box limits, upper and lower quartiles; whiskers,  $\pm 1.5 \times$  interquartile range (IQR); points, all data points.  $**p < 0.01$ ; Kruskal-Wallis test with Steel-Dwass test. (B) Immunoblot analysis of Notch1 expression in MDA-MB 157 and MDA-MB 468 cells after silencing *Glo1* using targeted siRNA. (C) *CD133* gene expression in breast cancer subtypes (from METABRIC dataset): center line, median; box limits, upper and lower quartiles; whiskers,  $\pm 1.5 \times$  interquartile range (IQR); points, all data points.  $**p < 0.01$ ; Kruskal-Wallis test with Steel-Dwass test. (D) Numbers of CD133-positive cells isolated from MDA-MB 157 cells and MDA-MB 468 cells after GLO1 knockdown (Left, representative FACS pattern; Right, Quantitative values).  $*p < 0.05$ ; Students *t*-test. Data represent the mean  $\pm$  SD (three independent experiments each).

**Normal-like**

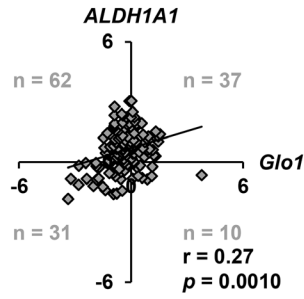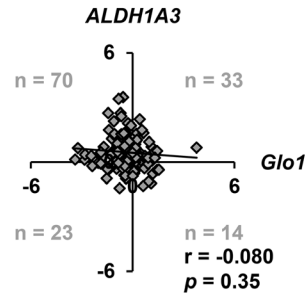

**Luminal A**

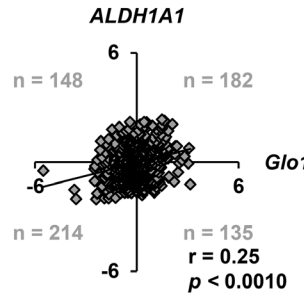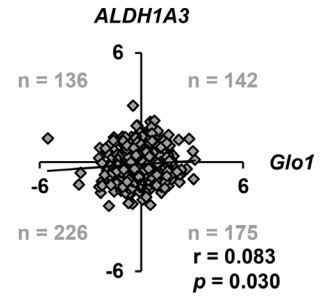

**Luminal B**

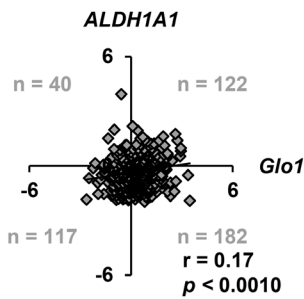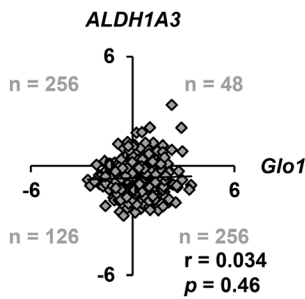

**HER2-enriched**

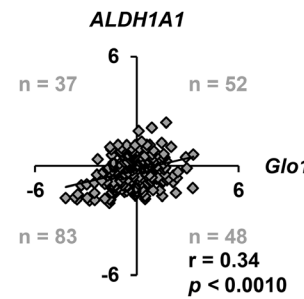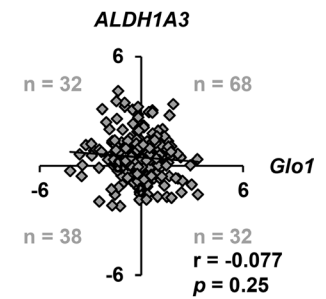

**Claudin-low**

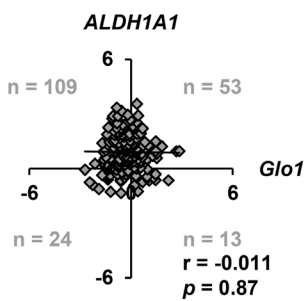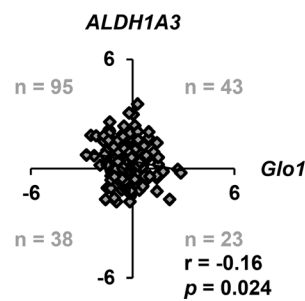

**Basal-like**

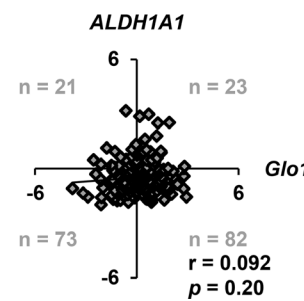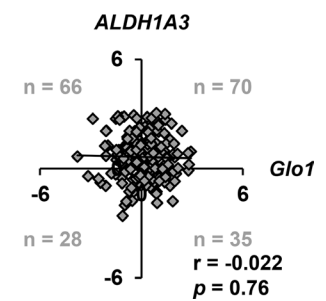

**Supplementary Figure 4: Correlation of *Glo1* expression with expression of *ALDH1A1* and *ALDH1A3* in the indicated breast cancer subtypes.** Values are shown as scattered plots. Pearson's correlation coefficients ( $r$ ) and  $p$  values are indicated.

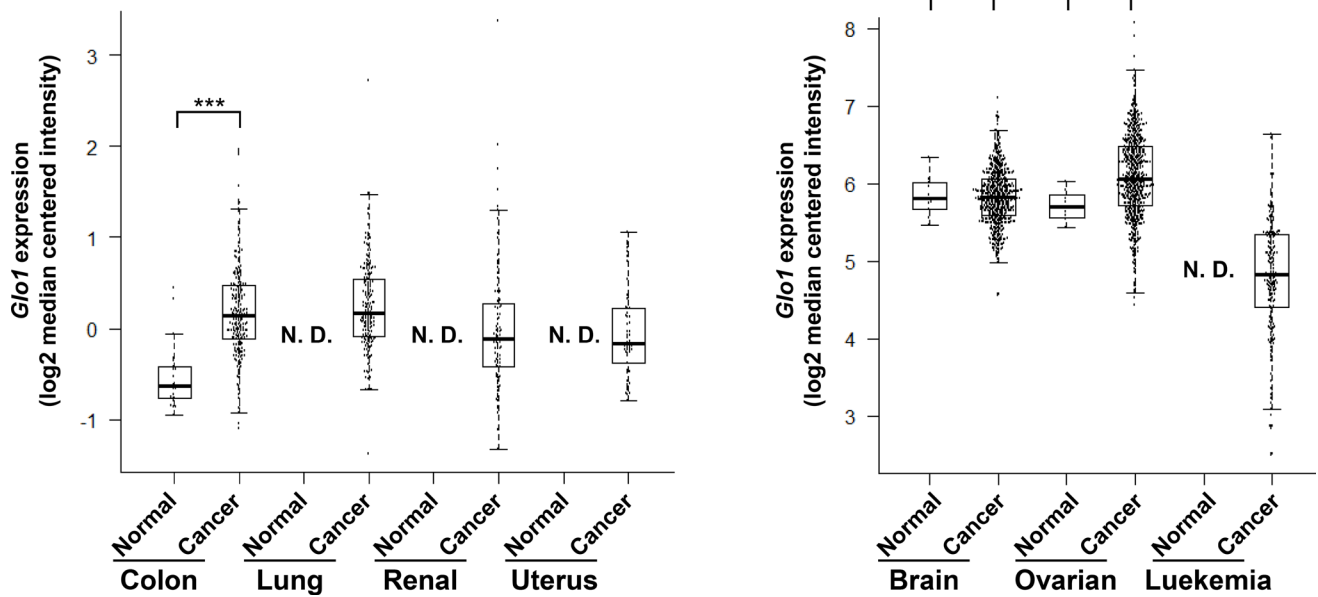

**Supplementary Figure 5: Comparison *Glo1* expression between normal tissue and the indicated cancers.** Box plots compare *Glo1* expression in each normal tissue and corresponding cancer tissue (from the TCGA dataset) (N. D. = no data): center line, median; box limits, upper and lower quartiles; whiskers,  $\pm 1.5 \times$  interquartile range (IQR); points, all data points (left, reporter A\_32\_P53822; right, reporter 200681). \*\*\* $p < 0.001$ , n.s. = not significant; Mann–Whitney  $U$  test.

**Supplementary Table 1: TCGA clinicopathological data from oncomine**

| <b>Variable</b>                |                                              | <b><i>n</i> = 593</b> | <b>(%)</b> |
|--------------------------------|----------------------------------------------|-----------------------|------------|
| Age                            | 57.9 ± 13.1 (26-90)                          |                       |            |
|                                | >61                                          | 206                   | (34.7)     |
|                                | ≤61                                          | 279                   | (47.0)     |
|                                | Not informative                              | 108                   | (18.2)     |
| Gender                         | Male                                         | 3                     | (0.5)      |
|                                | Female                                       | 484                   | (81.6)     |
|                                | Not informative                              | 106                   | (17.9)     |
|                                | Cancer and normal type                       | Breast                | 61         |
|                                | Tumor                                        | 532                   | (89.7)     |
| <b>Tumor histological type</b> |                                              | <b><i>n</i> = 532</b> | <b>(%)</b> |
| Estrogen receptor status       | Positive                                     | 273                   | (51.3)     |
|                                | Negative                                     | 95                    | (17.9)     |
|                                | Not informative                              | 164                   | (30.8)     |
| Progesterone receptor status   | Positive                                     | 228                   | (42.9)     |
|                                | Negative                                     | 144                   | (27.1)     |
|                                | Not informative                              | 160                   | (43.4)     |
| ERBB2 status                   | Positive                                     | 73                    | (13.7)     |
|                                | Negative                                     | 228                   | (42.9)     |
|                                | Not informative                              | 231                   | (43.4)     |
| Tumor stage                    | Stage I                                      | 49                    | (9.2)      |
|                                | Stage II                                     | 243                   | (45.7)     |
|                                | Stage III                                    | 93                    | (17.5)     |
|                                | Stage IV                                     | 13                    | (2.4)      |
|                                | Not informative                              | 134                   | (25.2)     |
| Tumor histologic subtype       | Intraductal Cribriform Breast Adenocarcinoma | 3                     | (0.6)      |
|                                | Invasive Breast Carcinoma                    | 76                    | (14.3)     |
|                                | Invasive Ductal Breast Carcinoma             | 392                   | (73.7)     |
|                                | Invasive Lobular Breast Carcinoma            | 36                    | (6.8)      |
|                                | Male Breast Carcinoma                        | 3                     | (0.6)      |
|                                | Mixed Lobular and Ductal Breast Carcinoma    | 7                     | (1.3)      |
|                                | Mucinous Breast Carcinoma                    | 4                     | (0.8)      |
|                                | Not informative                              | 11                    | (2.1)      |

**Supplementary Table 2: METABRIC clinicopathological data from cBioportal**

| <b>Variable</b>                |                              | <b><i>n</i> = 1904</b> | <b>(%)</b> |
|--------------------------------|------------------------------|------------------------|------------|
| Age                            | 61.1 ± 13.0 (21.9–96.3)      |                        |            |
|                                | >61                          | 993                    | (52.2)     |
|                                | ≤61                          | 911                    | (47.8)     |
| Gender                         | Male                         | 0                      | 0.0        |
|                                | Female                       | 1904                   | (100.0)    |
| Tumor size (mm)                | ≥5 cm                        | 142                    | (7.5)      |
|                                | <5 cm                        | 1744                   | (91.6)     |
|                                | Not informative              | 18                     | (0.9)      |
| Histological type              | ER                           |                        |            |
|                                |                              |                        |            |
| ER                             | +                            | 1459                   | (76.6)     |
|                                | –                            | 445                    | (23.4)     |
| PgR                            | +                            | 1009                   | (53.0)     |
|                                | –                            | 895                    | (47.0)     |
| HER2                           | +                            | 236                    | (12.4)     |
|                                | –                            | 1668                   | (87.6)     |
| Tumor stage                    | Stage 0                      | 4                      | (0.2)      |
|                                | Stage I                      | 475                    | (24.9)     |
|                                | Stage II                     | 800                    | (42.0)     |
|                                | Stage III                    | 115                    | (6.0)      |
|                                | Stage IV                     | 9                      | (0.5)      |
|                                | Not informative              | 501                    | (26.3)     |
| Neoplasm histologic grade      | Grade 1                      | 165                    | (8.7)      |
|                                | Grade 2                      | 740                    | (38.9)     |
|                                | Grade 3                      | 927                    | (48.7)     |
|                                | Not informative              | 72                     | (3.8)      |
| Pam50 + claudin-low subtype    | Normal-like                  | 140                    | (7.4)      |
|                                | Luminal A                    | 679                    | (35.7)     |
|                                | Luminal B                    | 461                    | (24.2)     |
|                                | HER2-enriched                | 220                    | (11.6)     |
|                                | Claudin-low                  | 199                    | (10.5)     |
|                                | Basal-like                   | 199                    | (10.5)     |
|                                | Not informative              | 6                      | (0.3)      |
|                                |                              |                        |            |
| Tumor other histologic subtype | DCIS                         | 2                      | (0.1)      |
|                                | IDC                          | 1727                   | (90.7)     |
|                                | ILC                          | 141                    | (7.4)      |
|                                | BENIGN                       | 1                      | (0.1)      |
|                                | Invasive Tumor               | 9                      | (0.5)      |
|                                | Mixed Nst and a special type | 3                      | (0.2)      |
|                                | Other                        | 10                     | (0.5)      |
|                                | Other Invasive               | 9                      | (0.5)      |
|                                | Not Classified               | 2                      | (0.1)      |



**Supplementary Table 3: Effect of *Glo1* expression on relative overall survival probability determined by multivariate analysis in breast cancer**

| <b>Cox proportional regression hazards model</b> |         | <b>Multivariate analysis</b> |                         |                |
|--------------------------------------------------|---------|------------------------------|-------------------------|----------------|
|                                                  |         | Hazard ratio                 | 95% confidence interval | <i>p</i> value |
| TCGA                                             | ALL     | 2.28                         | 0.84–6.22               | 0.11           |
| METABRIC                                         | ALL     | 0.99                         | 0.86–1.14               | 0.91           |
|                                                  | Grade 1 | 1.08                         | 0.59–1.99               | 0.79           |
|                                                  | Grade 2 | 1.09                         | 0.86–1.38               | 0.49           |
|                                                  | Grade 3 | 0.87                         | 0.72–1.05               | 0.15           |

**Supplementary Table 4: Effect of *Glo1* expression on relative overall survival probability determined by multivariate analysis in breast cancer subtypes**

| <b>Cox proportional regression hazards model</b> |               | <b>Multivariate analysis</b> |                         |                |
|--------------------------------------------------|---------------|------------------------------|-------------------------|----------------|
|                                                  |               | Hazard ratio                 | 95% confidence interval | <i>p</i> value |
|                                                  | Normal-like   | 1.14                         | 0.60–2.18               | 0.68           |
|                                                  | Luminal A     | 1.29                         | 1.01–1.64               | 0.038          |
|                                                  | Luminal B     | 0.76                         | 0.57–1.01               | 0.062          |
|                                                  | HER2-enriched | 1.62                         | 1.09–2.42               | 0.018          |
|                                                  | Claudin-low   | 0.64                         | 0.37–1.09               | 0.10           |
|                                                  | Basal-like    | 0.65                         | 0.40–1.05               | 0.076          |
